# Supplementary material for: Assessment of the Finite VolumE Sea Ice Ocean Model (FESOM2.0), Part I: Description of selected key model elements and comparison to its predecessor version
Source: Copernicus journal article supplement (doi:10.5194/gmd-2018-329), 2019-02-04
Supplement: Supplementary file 1 [file gmd-2018-329-supplement.pdf]

# Supplementary

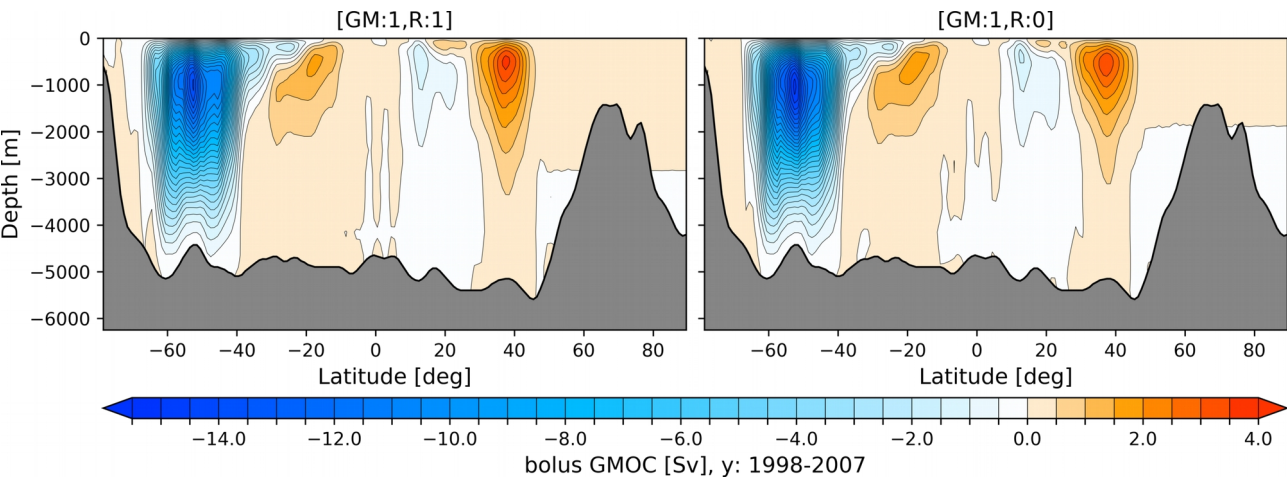

**Suppl. 1: Global Meridional Overturning Circulation (GMOC) calculated from Gent McWilliams vertical bolus velocity, averaged for the time period 1998-2007, for the reference simulation (left) and the simulation in which the Redi diffusivity is set to zero (right).**

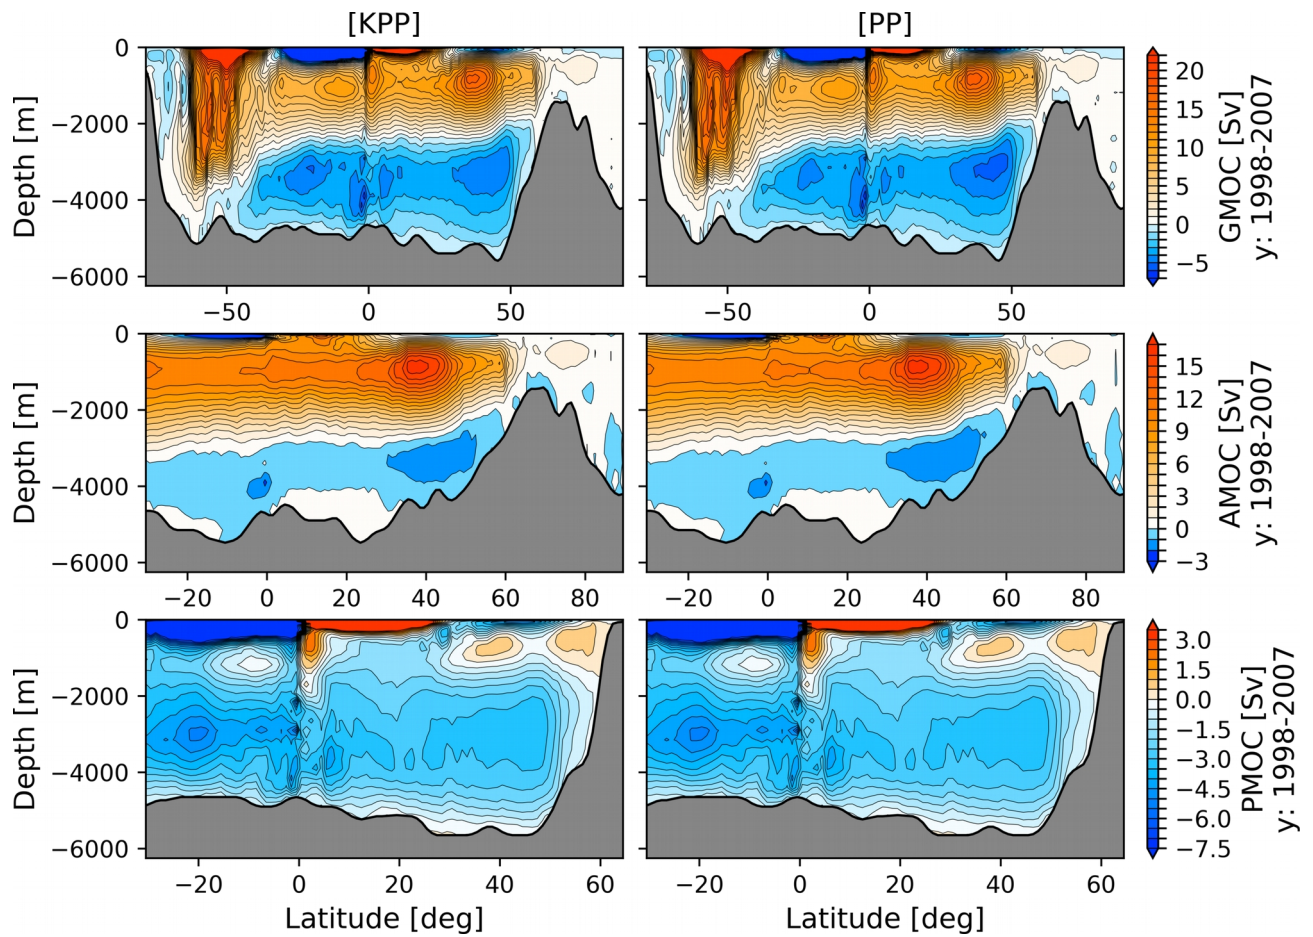

**Suppl. 2: Global (GMOC, upper row), Atlantic (AMOC, middle row) and Indo-Pacific (PMOC, lower row) Meridional Overturning Circulation averaged for the time period 1998-2007 for the simulations with KPP (left column) and PP (right column) vertical mixing.**

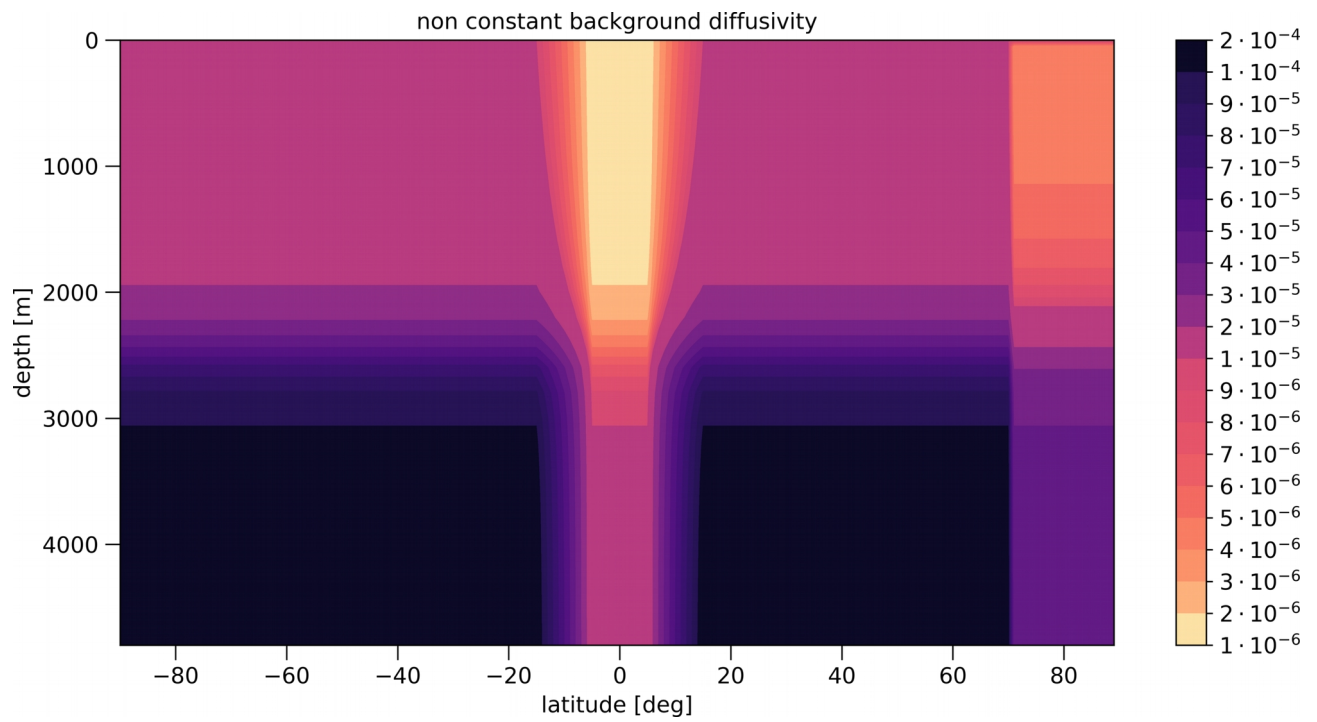

**Suppl. 3: Depth and latitude dependent background vertical diffusivity used in PP and KPP vertical mixing scheme.**
